# Supplementary material
Source: PubMed Central journal article supplement (PMC3268434)

Supplementary Figure 1. **Human IGF-IR sequence properties.** Schematic representation of the human IGF-IR sequence (1-1367 residues, IGF1R HUMAN). The following UniProt domains are denoted as red lines: signal peptide, EGFR L-domain, furin-like cysteine rich domain, fibronectin type III domains, and protein kinase domain. SUMOylation sites (according to (33) are shown below, as well as a consensus of four DNA binding predictions (as described in *Experimental procedures*). Highly conserved SUMOylation sites and DNA binding sites are colored blue, according to ConSurf analysis. The figure was produced by JalView [Waterhouse, A. M., Procter, J. B., Martin, D. M., Clamp, M., and Barton, G. J. (2009) *Bioinformatics* **25**, 1189-1191].

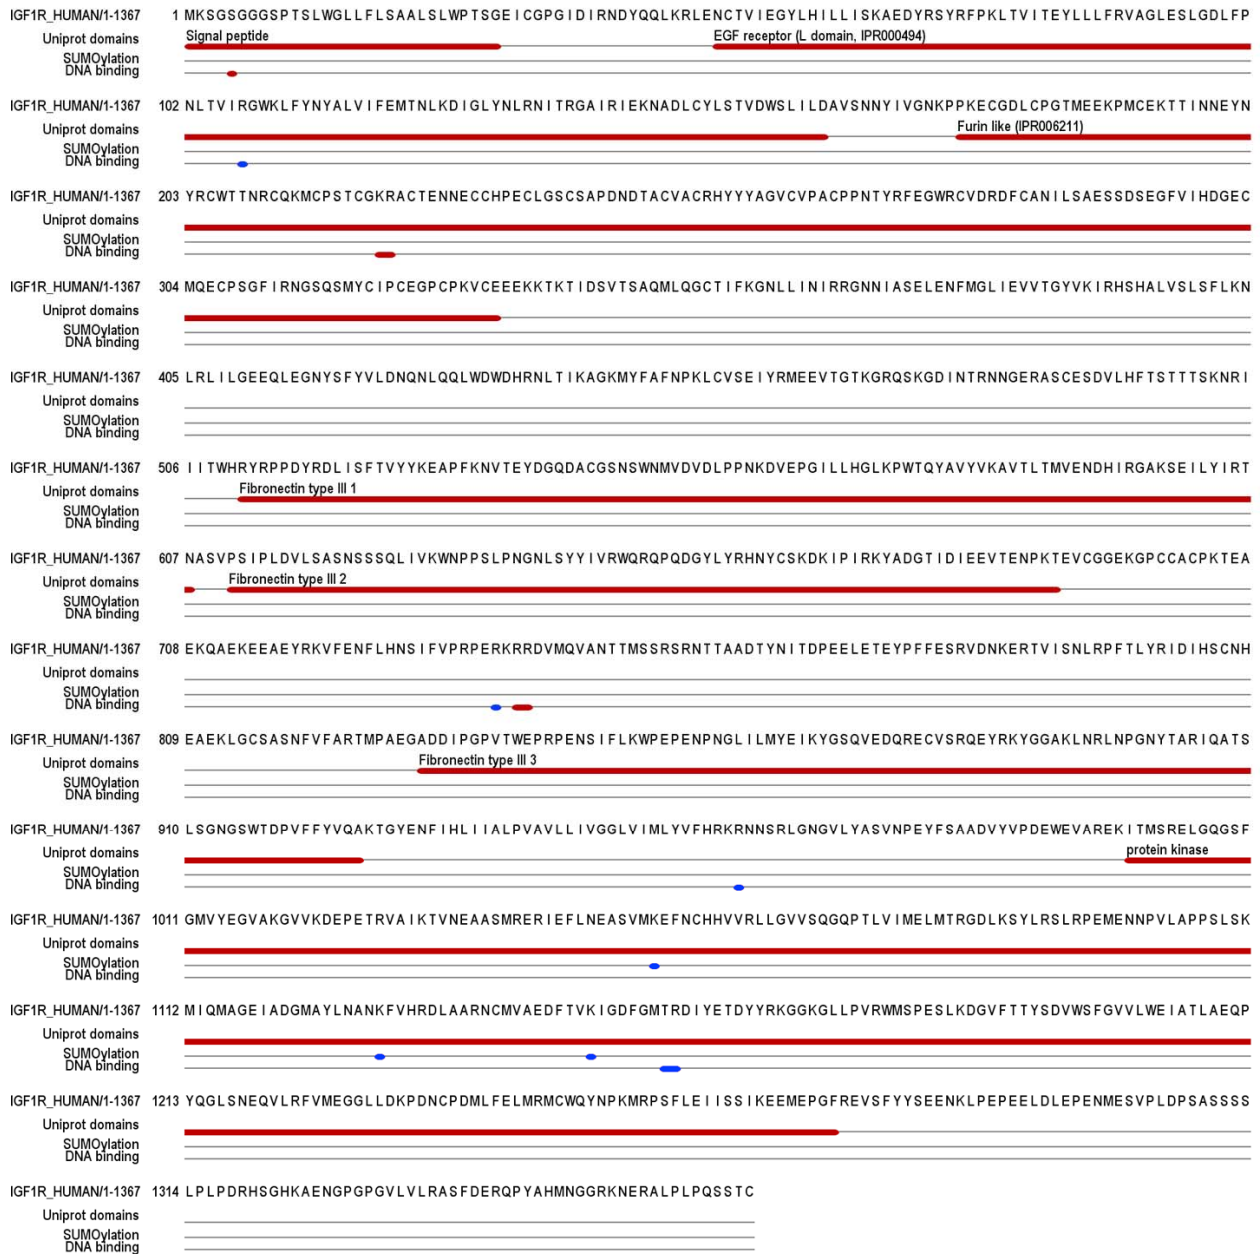

Supplement: supp_M111.281782_Supplementary_Figure_1.pdf [file supp_M111.281782_Supplementary_Figure_1.pdf]
