# Supplementary material
Source: PubMed Central journal article supplement (PMC3268434)
Supplement: supp_M111.281782_Supplementary_Figure_2.pdf [file supp_M111.281782_Supplementary_Figure_2.pdf]

Supplementary Figure 2. **Bioinformatic analysis of functional domains conservation in primary IGF-IR sequence.** IGF-IR sequence conservation was analyzed using *ConSurf* server, based on alignment of 24 homologues as described in *Experimental procedures*. Residues colored magenta are highly conserved, while residues colored turquoise are not conserved.

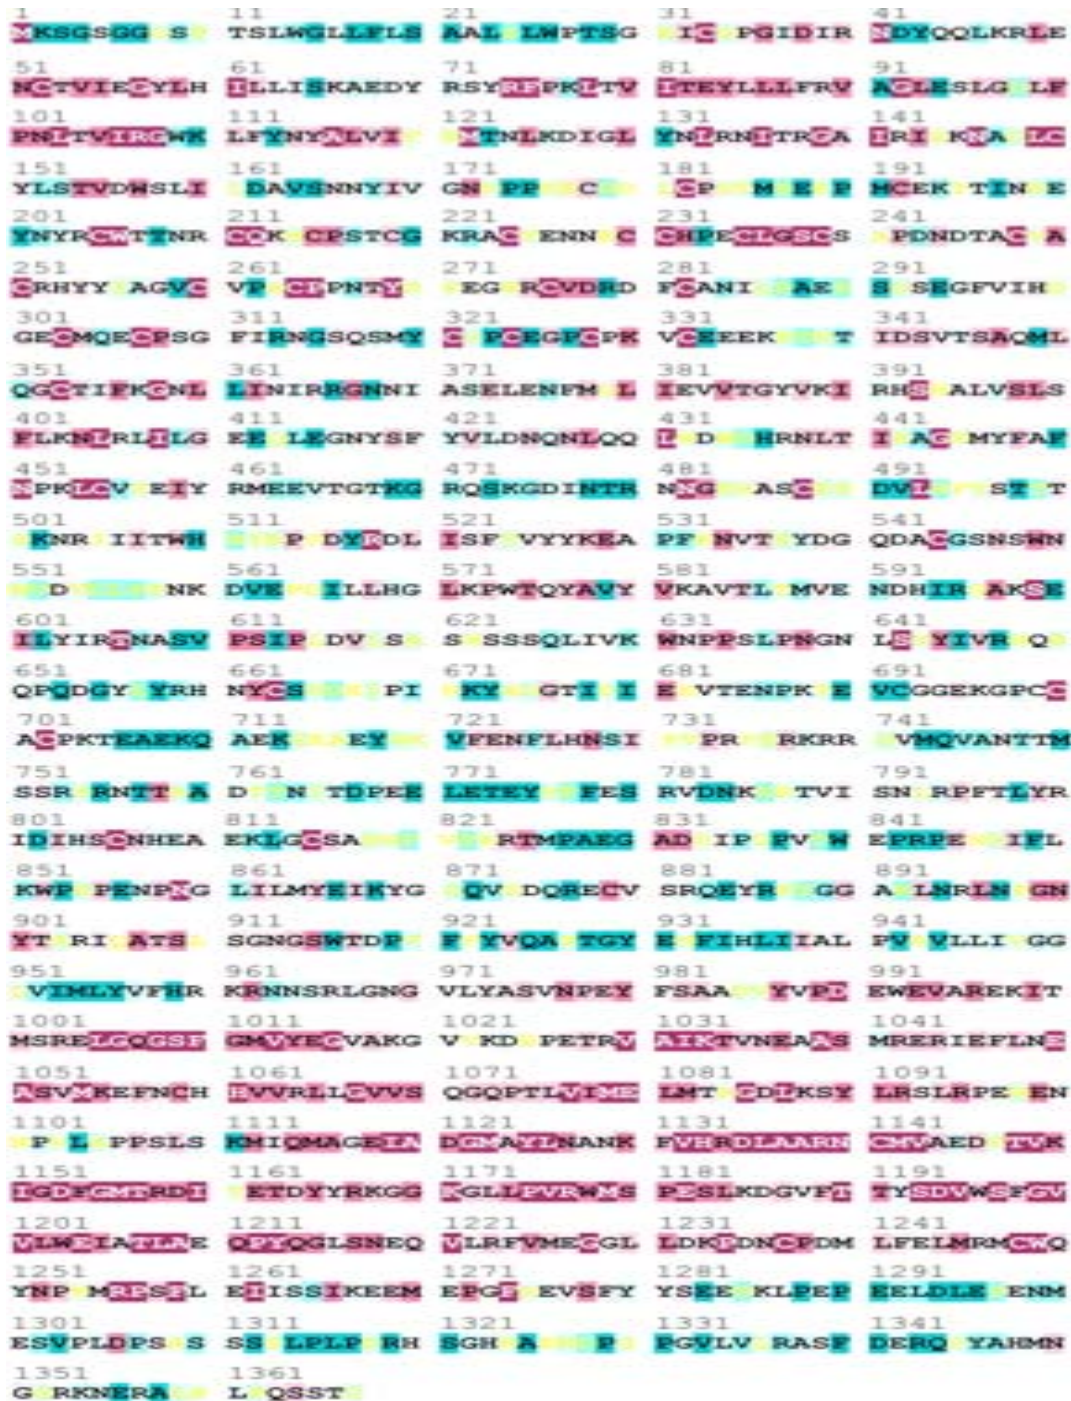

The conservation scale:  
1 2 3 4 5 6 7 8 9  
Variable Average Conserved
